# Supplementary material for: Cryo EM Analysis Reveals Inherent Flexibility of Authentic Murine Papillomavirus Capsids
Source: MDPI journal article supplement (doi:10.3390/v13102023), 2021-10-07
Supplement: s1 [file s1]

## Supplementary Information

**Supplementary Table S1. Cryo-EM data collection, refinement and validation statistics.**

| <b>Data Collection and Processing</b>  | <b>Icosahedral</b> | <b>Pentavalent Capsomer</b> | <b>Hexavalent Capsomer</b> |
|----------------------------------------|--------------------|-----------------------------|----------------------------|
| Magnification                          | 59,000             | 59,000                      | 59,000                     |
| Voltage (kV)                           | 300                | 300                         | 300                        |
| Electron Exposure (e-/Å <sup>2</sup> ) | 45                 | 45                          | 45                         |
| Defocus Range (um)                     | 0.5-3.0            | 0.5-3.0                     | 0.5-3.0                    |
| Pixel Size (Å)                         | 1.1                | 1.1                         | 1.1                        |
| Symmetry Imposed                       | I1                 | C5                          | C1                         |
| Initial Particle Number                | 16,978             | -                           | -                          |
| Final Particle Number                  | 10,181             | -                           | -                          |
| Sub-particles per Particle             | -                  | 12                          | 60                         |
| Final Sub-particle Number              | -                  | 122,172                     | 610,860                    |
| Map Resolution                         | 4.41               | 3.4                         | 3.3                        |
| FSC Threshold                          | 0.143              | 0.143                       | 0.143                      |

  

| <b>Refinement</b>    | <b>Recombined Capsid</b> |
|----------------------|--------------------------|
| Model composition    |                          |
| Non-hydrogen atoms   | 22959                    |
| Protein Residues     | 2867                     |
| B-Factors            |                          |
| Protein              | 53.4                     |
| Validation           |                          |
| MolProbity Score     | 1.71                     |
| Clash Score          | 6.65                     |
| Rotamer Outliers (%) | 0.04                     |
| Ramachandran Plot    |                          |
| Favored (%)          | 95.10                    |
| Outliers (%)         | 0.28                     |

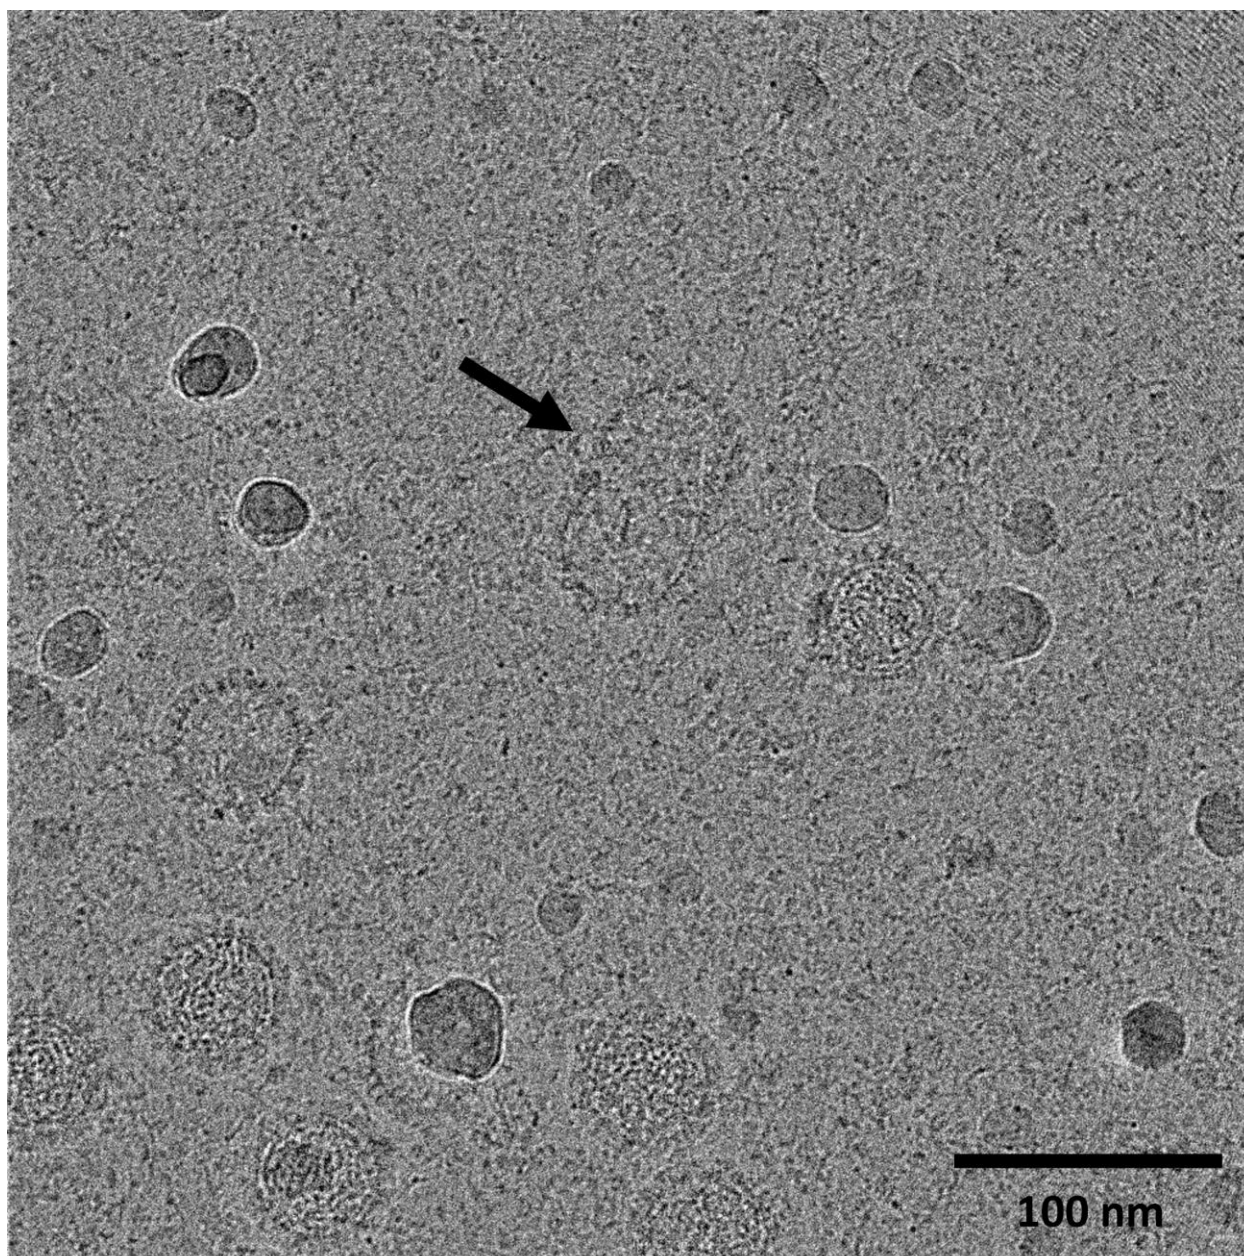

**Supplementary Figure S1. Micrograph with rod like structure.** Black arrow points to a rod like structure that is seen within the dataset.

A:F

| Level               | Count | Std Dev   | MeanAbsDif to Mean | MeanAbsDif to Median |
|---------------------|-------|-----------|--------------------|----------------------|
| HPV16 Quasivirus    | 43679 | 0.0407412 | 0.0289734          | 0.0289458            |
| MmuPV1 Native Virus | 2681  | 0.0254883 | 0.0164075          | 0.0163573            |

  

| Test           | F Ratio  | DFNum | DFDen | p-Value |
|----------------|----------|-------|-------|---------|
| O'Brien[.5]    | 233.1095 | 1     | 46358 | <.0001* |
| Brown-Forsythe | 500.3583 | 1     | 46358 | <.0001* |
| Levene         | 501.7482 | 1     | 46358 | <.0001* |
| Bartlett       | 853.3847 | 1     | .     | <.0001* |
| F Test 2-sided | 2.5550   | 43678 | 2680  | <.0001* |

B:Null

| Level               | Count | Std Dev   | MeanAbsDif to Mean | MeanAbsDif to Median |
|---------------------|-------|-----------|--------------------|----------------------|
| HPV16 Quasivirus    | 87358 | 0.0358045 | 0.0255266          | 0.0255079            |
| MmuPV1 Native Virus | 5108  | 0.0230426 | 0.0151967          | 0.0151844            |

  

| Test           | F Ratio   | DFNum | DFDen | p-Value |
|----------------|-----------|-------|-------|---------|
| O'Brien[.5]    | 401.7804  | 1     | 92464 | <.0001* |
| Brown-Forsythe | 835.8814  | 1     | 92464 | <.0001* |
| Levene         | 841.2870  | 1     | 92464 | <.0001* |
| Bartlett       | 1460.2527 | 1     | .     | <.0001* |
| F Test 2-sided | 2.4144    | 87357 | 5107  | <.0001* |

C:D

| Level               | Count | Std Dev   | MeanAbsDif to Mean | MeanAbsDif to Median |
|---------------------|-------|-----------|--------------------|----------------------|
| HPV16 Quasivirus    | 87358 | 0.0375155 | 0.0262676          | 0.0262637            |
| MmuPV1 Native Virus | 4825  | 0.0254530 | 0.0157794          | 0.0157787            |

  

| Test           | F Ratio   | DFNum | DFDen | p-Value |
|----------------|-----------|-------|-------|---------|
| O'Brien[.5]    | 304.5668  | 1     | 92181 | <.0001* |
| Brown-Forsythe | 716.1693  | 1     | 92181 | <.0001* |
| Levene         | 717.7739  | 1     | 92181 | <.0001* |
| Bartlett       | 1101.6752 | 1     | .     | <.0001* |
| F Test 2-sided | 2.1724    | 87357 | 4824  | <.0001* |

E:E

| Level               | Count | Std Dev   | MeanAbsDif to Mean | MeanAbsDif to Median |
|---------------------|-------|-----------|--------------------|----------------------|
| HPV16 Quasivirus    | 43679 | 0.0392467 | 0.0282713          | 0.0282526            |
| MmuPV1 Native Virus | 2765  | 0.0274450 | 0.0187063          | 0.0186933            |

  

| Test           | F Ratio  | DFNum | DFDen | p-Value |
|----------------|----------|-------|-------|---------|
| O'Brien[.5]    | 181.0447 | 1     | 46442 | <.0001* |
| Brown-Forsythe | 328.5869 | 1     | 46442 | <.0001* |
| Levene         | 330.0078 | 1     | 46442 | <.0001* |
| Bartlett       | 542.9211 | 1     | .     | <.0001* |
| F Test 2-sided | 2.0449   | 43678 | 2764  | <.0001* |

Diameter

| Level               | Count | Std Dev   | MeanAbsDif to Mean | MeanAbsDif to Median |
|---------------------|-------|-----------|--------------------|----------------------|
| HPV16 Quasivirus    | 50224 | 0.0090671 | 0.0072330          | 0.0072330            |
| MmuPV1 Native Virus | 3967  | 0.0106710 | 0.0078790          | 0.0078165            |

  

| Test           | F Ratio  | DFNum | DFDen | p-Value |
|----------------|----------|-------|-------|---------|
| O'Brien[.5]    | 181.3232 | 1     | 54189 | <.0001* |
| Brown-Forsythe | 39.5270  | 1     | 54189 | <.0001* |
| Levene         | 48.7183  | 1     | 54189 | <.0001* |
| Bartlett       | 214.1058 | 1     | .     | <.0001* |
| F Test 2-sided | 1.3851   | 3966  | 50223 | <.0001* |

**Supplementary Figure S2. Statistical Tests of Unequal Variances.** Comparison of HPV16 QV and MmuPV1 for intercapsomere distances and diameter compared through unequal variances.

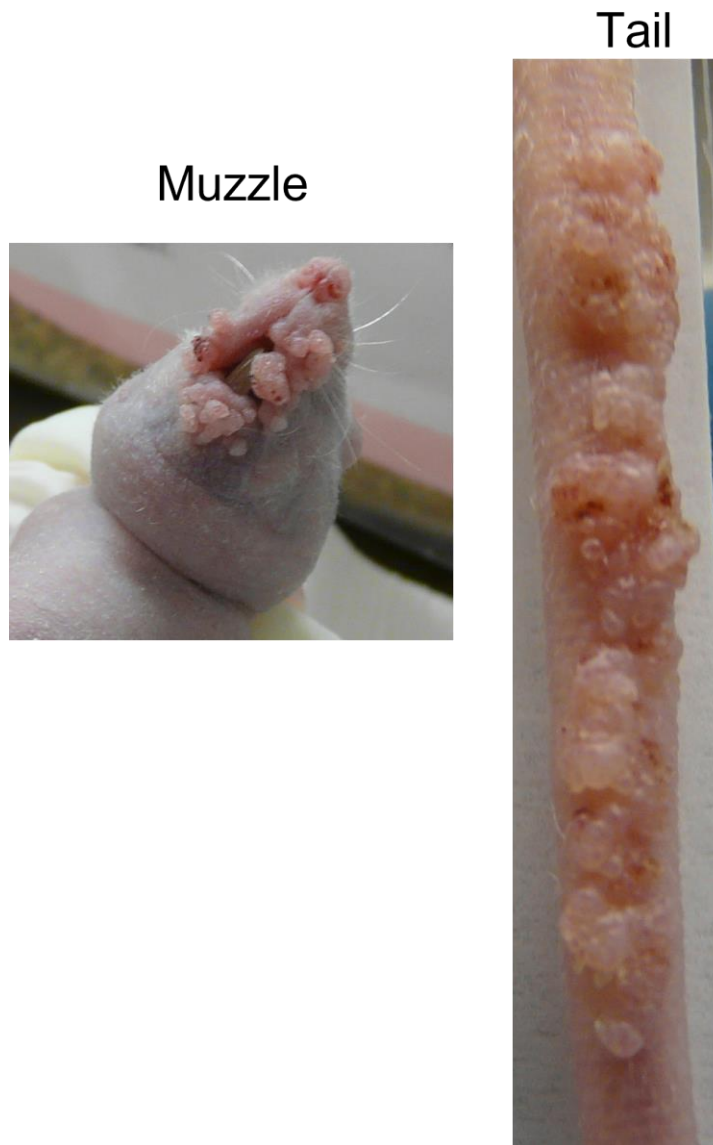

**Supplementary Figure S3. Lesions virus sample was purified from.** Virus sample was purified from mouse wart homogenate from the muzzle and tail of infected mice.



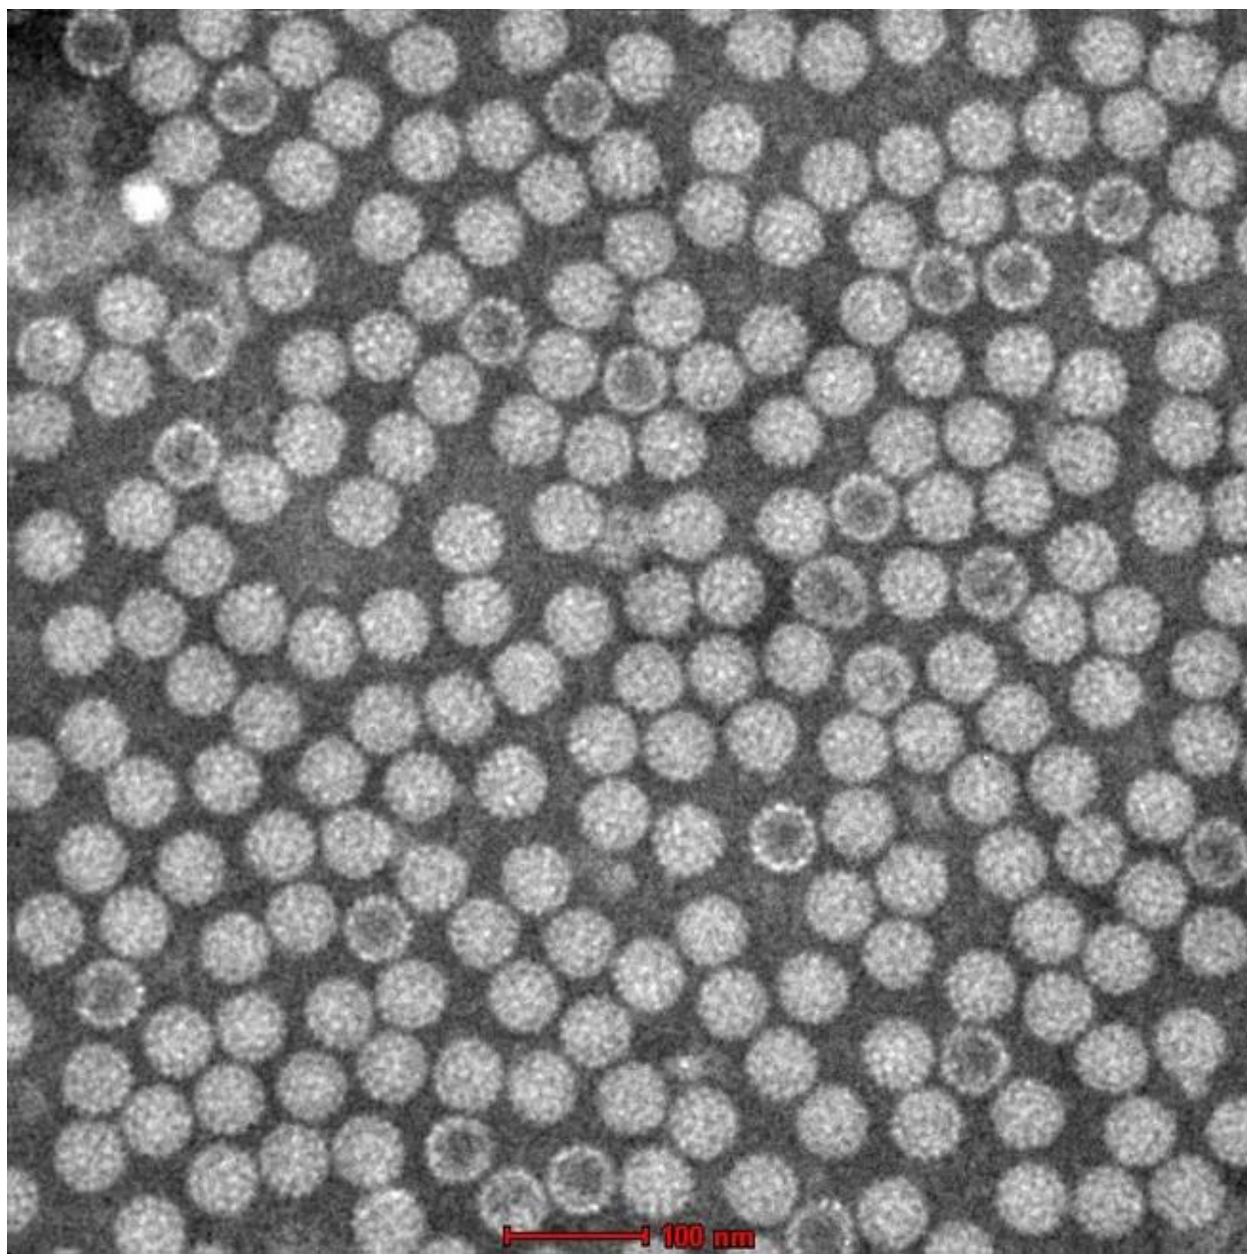

**Supplementary Figure S4. TEM negative stain image of virus before vitrification.**

# Sequence Alignment

AYV61481.1 L1 [Human papillomavirus type 16]

ATU83344.1 viral protein L1 [Mus musculus papillomavirus type 1]

|            |     |                                                                |
|------------|-----|----------------------------------------------------------------|
| AYV61481.1 | 1   | MQVTFIYILVITCYENDVNVYHIFQMSIWLSEATVYLP-VPVSKVSTDEYVARTNI       |
| ATU83344.1 | 1   | -----MAWTFQTGKLYLPPTTPVAKVSTDEYVYPTSL                          |
| AYV61481.1 | 60  | YYHAGTSRLLA VGHPYFPKKENNNKILVPKVSGLOYRVFRIHLPDPNKFQFPDTSFYNP   |
| ATU83344.1 | 35  | ECHAHTDRLLTVGHPEFSVI--DNDKVTVPKVSGNQYRVFRLKFPDPNKFALPQKDFYDP   |
| AYV61481.1 | 120 | LTQRLVWACVGVGVGRGQPLGVGISGHPLLNKLLDTENASAYAANAGVDNRECI SMDYKQ  |
| ATU83344.1 | 93  | EKERLVWRLRGLEITGRGGPLGIGTTGHPLFNKLGDTENPNKYQQG-SKDNRRQNTSMDPKQ |
| AYV61481.1 | 180 | TQLCLIGCKPPIGEHWGKESPTCNVAVNP GDCPPELNNVVIQDGMVDTGFGAMDFTTL    |
| ATU83344.1 | 152 | TQLFIVGCEPPTGEHWDVVKPCG--ALEK GDCPPIQLVNSVIEDGDMCDIGFGNMNFKEI  |
| AYV61481.1 | 240 | QANKSEVPLDICTSICKYPDYIKMVSEPYGDSLFFYLRRQMFVRHLEFNRAVGENVPD     |
| ATU83344.1 | 210 | QQDRSGVPLDIVSTRCKNPDFIKMTNEAYGDKVFFFGRRQVYARHFTTRNGSVGEPIPN    |
| AYV61481.1 | 300 | D-----LYIKG--SGSTANLASSNYFPTPSGSMVTSDAQIFNKPYPWLQRAQCHNNGICWG  |
| ATU83344.1 | 270 | SVSPSDFYYAPDSIQDQKTLAPSVYFGTPSGSLVSSDQIFNRPFWLQRAQGNNGVCWH     |
| AYV61481.1 | 353 | NQLFVTVVDITRSTNMSLCAAISTSE-TTYKNTNFKEYLRHGEEYDLQFIFQLCKITLTA   |
| ATU83344.1 | 330 | NELFVTVVDNTRNTNFTISQQTNTPNPDYDSTNFKNYLRHVEQFELSILIAQLCKVPLDP   |
| AYV61481.1 | 412 | DVMYTIHSMNSTILEDWNEGLQPPPGGTLEBDTYRFVTSCAIACQKHTPPAPKEDPLKKYT  |
| ATU83344.1 | 390 | GVLAHINTMNPITILENWNLGFVPPPQQSISLDYRYITSSATRCPDQNPPKEDDPYKGLI   |
| AYV61481.1 | 472 | FWEVNLKEKFSADLDQFPLGRKFLLQAGLKAKPKFTLGKRKAIPPTSSISTAKRKKRKL    |
| ATU83344.1 | 450 | FWEVDLTERFSQDLDQFALGRKFLYQAGIRTAVTGRGVKRAASTTSASSRRVVKRKRGSK   |

**Supplementary Figure S5. Sequence alignment of HPV16 and MmuPV1 L1, major capsid protein.**
